# Supplementary material for: Current perspectives on the intensity of natural selection of MHC loci
Source: PubMed Central journal article supplement — Immunogenetics. 2013 Apr 3;65(6):479–83. doi: 10.1007/s00251-013-0693-x (PMC3651823; doi:10.1007/s00251-013-0693-x), 2013-04-03
Supplement: 251_2013_693_MOESM1_ESM.pdf [file 251_2013_693_MOESM1_ESM.pdf]

**Article title:** Current perspectives on the intensity of natural selection of MHC loci

**Journal name:** Immunogenetics

**Authors names:** Yoshiki Yasukochi\* and Yoko Satta

**Affiliation and e-mail address of the corresponding author:** Department of Evolutionary Studies of Biosystems, the Graduate University for Advanced Studies, Shonan Village, Hayama, Kanagawa, 240-0193, Japan.

**Table S1 HLA alleles used for the estimation of selection intensity**

| <b>Locus</b>    | <b>Alleles</b>              |                             |                          |
|-----------------|-----------------------------|-----------------------------|--------------------------|
| <b>HLA-A</b>    | <i>HLA-A*03:01:01</i>       | <i>HLA-A*23:01:01</i>       | <i>HLA-A*24:02:01</i>    |
|                 | <i>HLA-A*26:01:01</i>       | <i>HLA-A*29:02:01</i>       | <i>HLA-A*31:01:02</i>    |
|                 | <i>HLA-A*32:01:01</i>       | <i>HLA-A*33:03:01</i>       | <i>HLA-A*34:01:01</i>    |
| <b>HLA-B</b>    | <i>HLA-B*13:01:01</i>       | <i>HLA-B*15:01:01</i>       | <i>HLA-B*15:02:01</i>    |
|                 | <i>HLA-B*15:03:01</i>       | <i>HLA-B*15:25:01</i>       | <i>HLA-B*18:01:01</i>    |
|                 | <i>HLA-B*27:05:02</i>       | <i>HLA-B*35:01:01</i>       | <i>HLA-B*39:01:03</i>    |
|                 | <i>HLA-B*40:02:01</i>       | <i>HLA-B*44:03:01</i>       | <i>HLA-B*46:01:01</i>    |
|                 | <i>HLA-B*46:01:05</i>       | <i>HLA-B*51:01:01</i>       | <i>HLA-B*53:01:01</i>    |
|                 | <i>HLA-B*55:02:01</i>       | <i>HLA-B*56:01:01</i>       | <i>HLA-B*58:01:01</i>    |
|                 | <i>HLA-B*58:02</i>          |                             |                          |
| <b>HLA-C</b>    | <i>HLA-C*01:02:01</i>       | <i>HLA-C*02:02:01</i>       | <i>HLA-C*03:02:01</i>    |
|                 | <i>HLA-C*03:03:01</i>       | <i>HLA-C*03:04:01</i>       | <i>HLA-C*04:01:01</i>    |
|                 | <i>HLA-C*04:03</i>          | <i>HLA-C*05:01:01</i>       | <i>HLA-C*06:02:01</i>    |
|                 | <i>HLA-C*07:01:01</i>       | <i>HLA-C*07:02:01</i>       | <i>HLA-C*07:04:01</i>    |
|                 | <i>HLA-C*08:01:01</i>       | <i>HLA-C*08:02:01</i>       | <i>HLA-C*12:02:01</i>    |
|                 | <i>HLA-C*12:03:01</i>       | <i>HLA-C*14:02:01</i>       | <i>HLA-C*15:02:01</i>    |
|                 | <i>HLA-C*16:01:01</i>       | <i>HLA-C*17:01:01</i>       |                          |
| <b>HLA-DRB1</b> | <i>HLA-DRB1*01:01:01</i>    | <i>HLA-DRB1*01:02:01</i>    | <i>HLA-DRB1*03:01:01</i> |
|                 | <i>HLA-DRB1*04:01:01</i>    | <i>HLA-DRB1*04:03:01</i>    | <i>HLA-DRB1*04:04:01</i> |
|                 | <i>HLA-DRB1*04:05:01</i>    | <i>HLA-DRB1*04:07:01</i>    | <i>HLA-DRB1*04:11</i>    |
|                 | <i>HLA-DRB1*07:01:01</i>    | <i>HLA-DRB1*08:02:01</i>    | <i>HLA-DRB1*08:03:02</i> |
|                 | <i>HLA-DRB1*09:01:02</i>    | <i>HLA-DRB1*10:01:01</i>    | <i>HLA-DRB1*11:01:01</i> |
|                 | <i>HLA-DRB1*11:04:01</i>    | <i>HLA-DRB1*12:01:01</i>    | <i>HLA-DRB1*12:02:01</i> |
|                 | <i>HLA-DRB1*13:01:01</i>    | <i>HLA-DRB1*13:02:01</i>    | <i>HLA-DRB1*14:01:01</i> |
|                 | <i>HLA-DRB1*15:01:01</i>    | <i>HLA-DRB1*15:02:01</i>    | <i>HLA-DRB1*15:03:01</i> |
|                 | <i>HLA-DRB1*16:02:01</i>    |                             |                          |
| <b>HLA-DQB1</b> | <i>HLA-DQB1*02:01:01</i>    | <i>HLA-DQB1*03:01:01</i>    | <i>HLA-DQB1*03:02:01</i> |
|                 | <i>HLA-DQB1*03:03:02</i>    | <i>HLA-DQB1*04:02:01</i>    | <i>HLA-DQB1*05:01:01</i> |
|                 | <i>HLA-DQB1*05:02:01</i>    | <i>HLA-DQB1*05:03:01</i>    | <i>HLA-DQB1*06:01:01</i> |
|                 | <i>HLA-DQB1*06:02:01</i>    | <i>HLA-DQB1*06:03:01</i>    | <i>HLA-DQB1*06:04:01</i> |
|                 | <i>HLA-DQB1*06:09</i>       |                             |                          |
| <b>HLA-DPB1</b> | <i>HLA-DPB1*01:01:01</i>    | <i>HLA-DPB1*02:01:02</i>    | <i>HLA-DPB1*03:01:01</i> |
|                 | <i>HLA-DPB1*04:01:01</i>    | <i>HLA-DPB1*04:02</i>       | <i>HLA-DPB1*05:01:01</i> |
|                 | <i>HLA-DPB1*13:01</i>       | <i>HLA-DPB1*14:01</i>       | <i>HLA-DPB1*17:01</i>    |
|                 | <i>HLA-DPB1*18:01</i>       |                             |                          |
| <b>HLA-DRB3</b> | <i>HLA-DRB3*01:01:02:01</i> | <i>HLA-DRB3*01:01:02:02</i> | <i>HLA-DRB3*02:01</i>    |
|                 | <i>HLA-DRB3*02:02:01:01</i> | <i>HLA-DRB3*02:02:01:02</i> | <i>HLA-DRB3*02:10</i>    |
|                 | <i>HLA-DRB3*02:11</i>       | <i>HLA-DRB3*02:20</i>       | <i>HLA-DRB3*02:24</i>    |
|                 | <i>HLA-DRB3*02:28</i>       | <i>HLA-DRB3*03:01:01</i>    | <i>HLA-DRB3*03:01:03</i> |
|                 | <i>HLA-DRB3*03:03</i>       |                             |                          |
| <b>HLA-DRB5</b> | <i>HLA-DRB5*01:01:01</i>    | <i>HLA-DRB5*01:02</i>       | <i>HLA-DRB5*01:14</i>    |
|                 | <i>HLA-DRB5*02:02</i>       | <i>HLA-DRB5*02:06</i>       |                          |
| <b>HLA-DQA1</b> | <i>HLA-DQA1*01:03:01</i>    | <i>HLA-DQA1*02:01</i>       | <i>HLA-DQA1*03:01:01</i> |
|                 | <i>HLA-DQA1*03:02</i>       | <i>HLA-DQA1*04:01:01</i>    | <i>HLA-DQA1*05:01:01</i> |
| <b>HLA-DPA1</b> | <i>HLA-DPA1*01:03:01</i>    | <i>HLA-DPA1*02:02:01</i>    | <i>HLA-DPA1*03:01</i>    |
